# Supplementary material for: Analysis of the Structural Aspects of Tannin-Based Adhesives by 2D-NMR
Source: MDPI journal article supplement (doi:10.3390/ma14195479), 2021-09-22
Supplement: s1 [file s1]

## Supplementary Materials

Analysis of the structural aspects of tannin-based adhesives by 2D-NMR

Sachikazu Omura<sup>1\*</sup>, Yoshinori Kawazoe<sup>2\*</sup>, and Daisuke Uemura<sup>1,3</sup>

<sup>1</sup>Institute of Natural Drug-Leads, Kanagawa University

<sup>2</sup>Center for Education and Research in Agricultural Innovation, Faculty of  
Agriculture, Saga University

<sup>3</sup>Department of Chemistry, Kanagawa University

\*Corresponding author: Tel.: +81-463-5911, [sachi@omura-zh.ch](mailto:sachi@omura-zh.ch) (S.O.)

\*Corresponding author: Tel.: +81-955-77-4484, [ykawazoe@cc.saga-u.ac.jp](mailto:ykawazoe@cc.saga-u.ac.jp)

(Y.K.)

Higher Resolution Images of NMR spectra in Figures 1–4

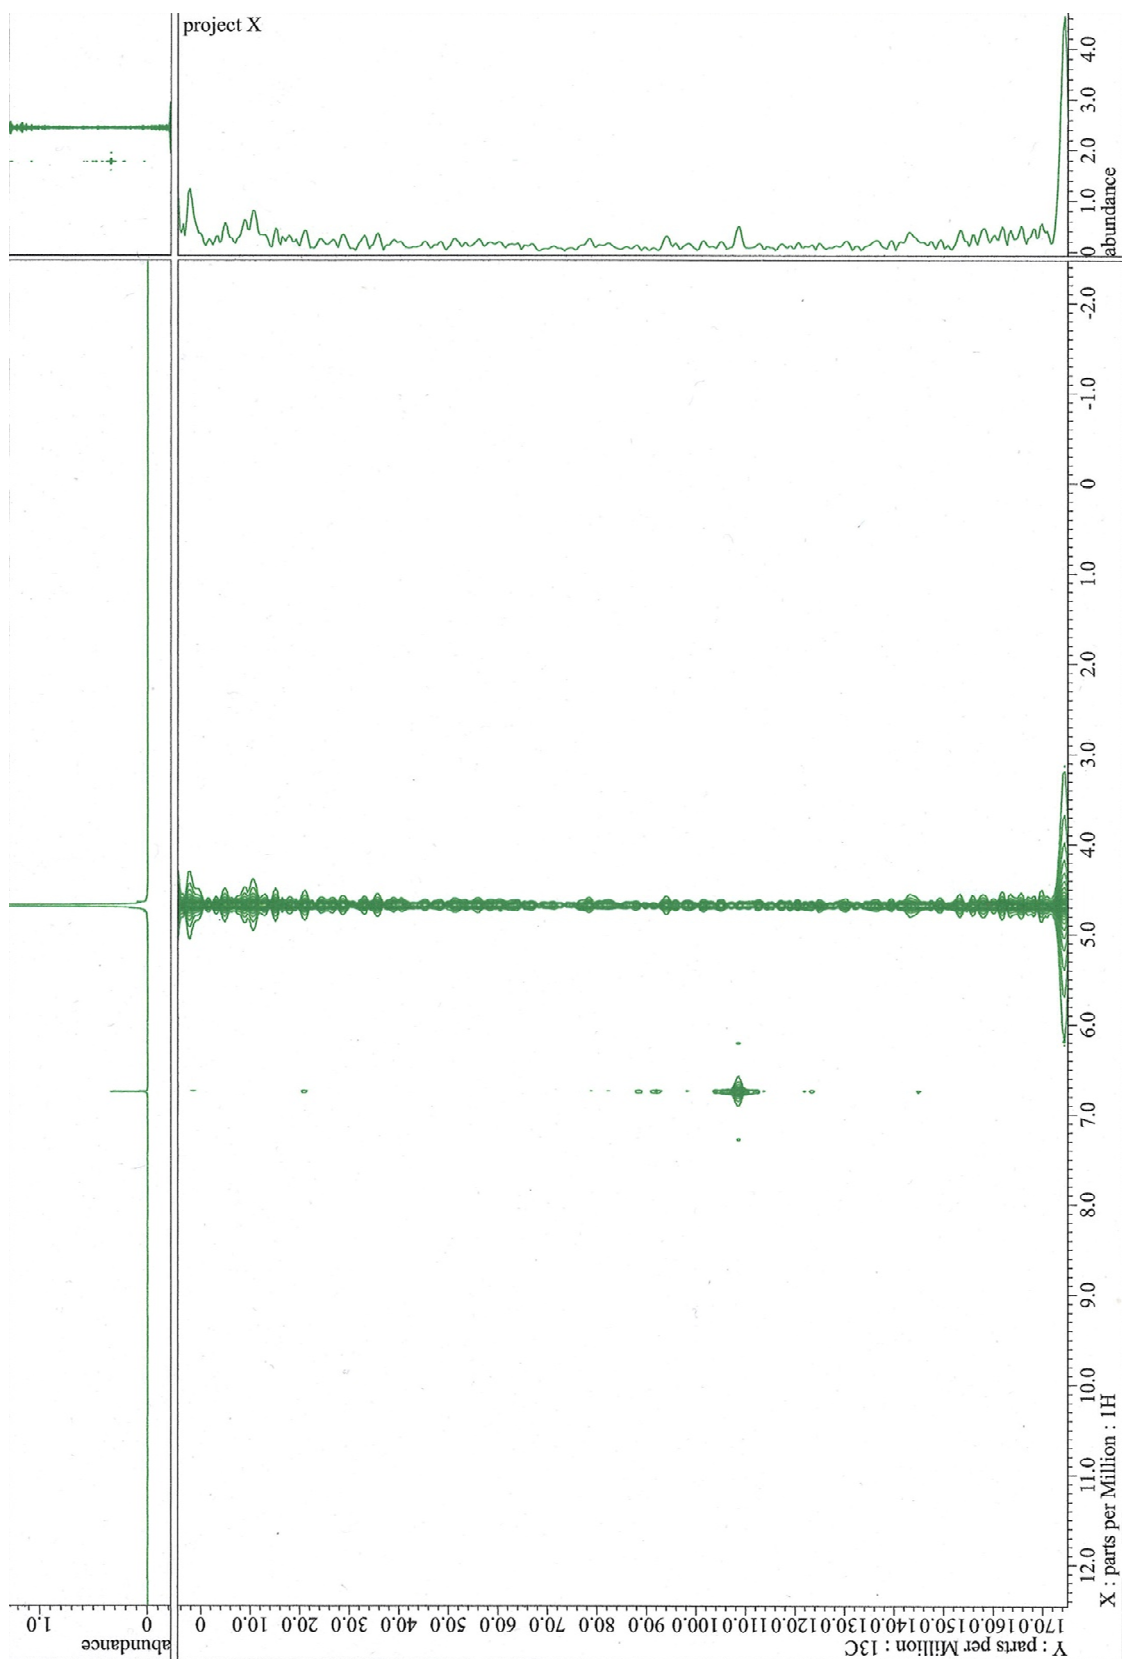

Figure1a

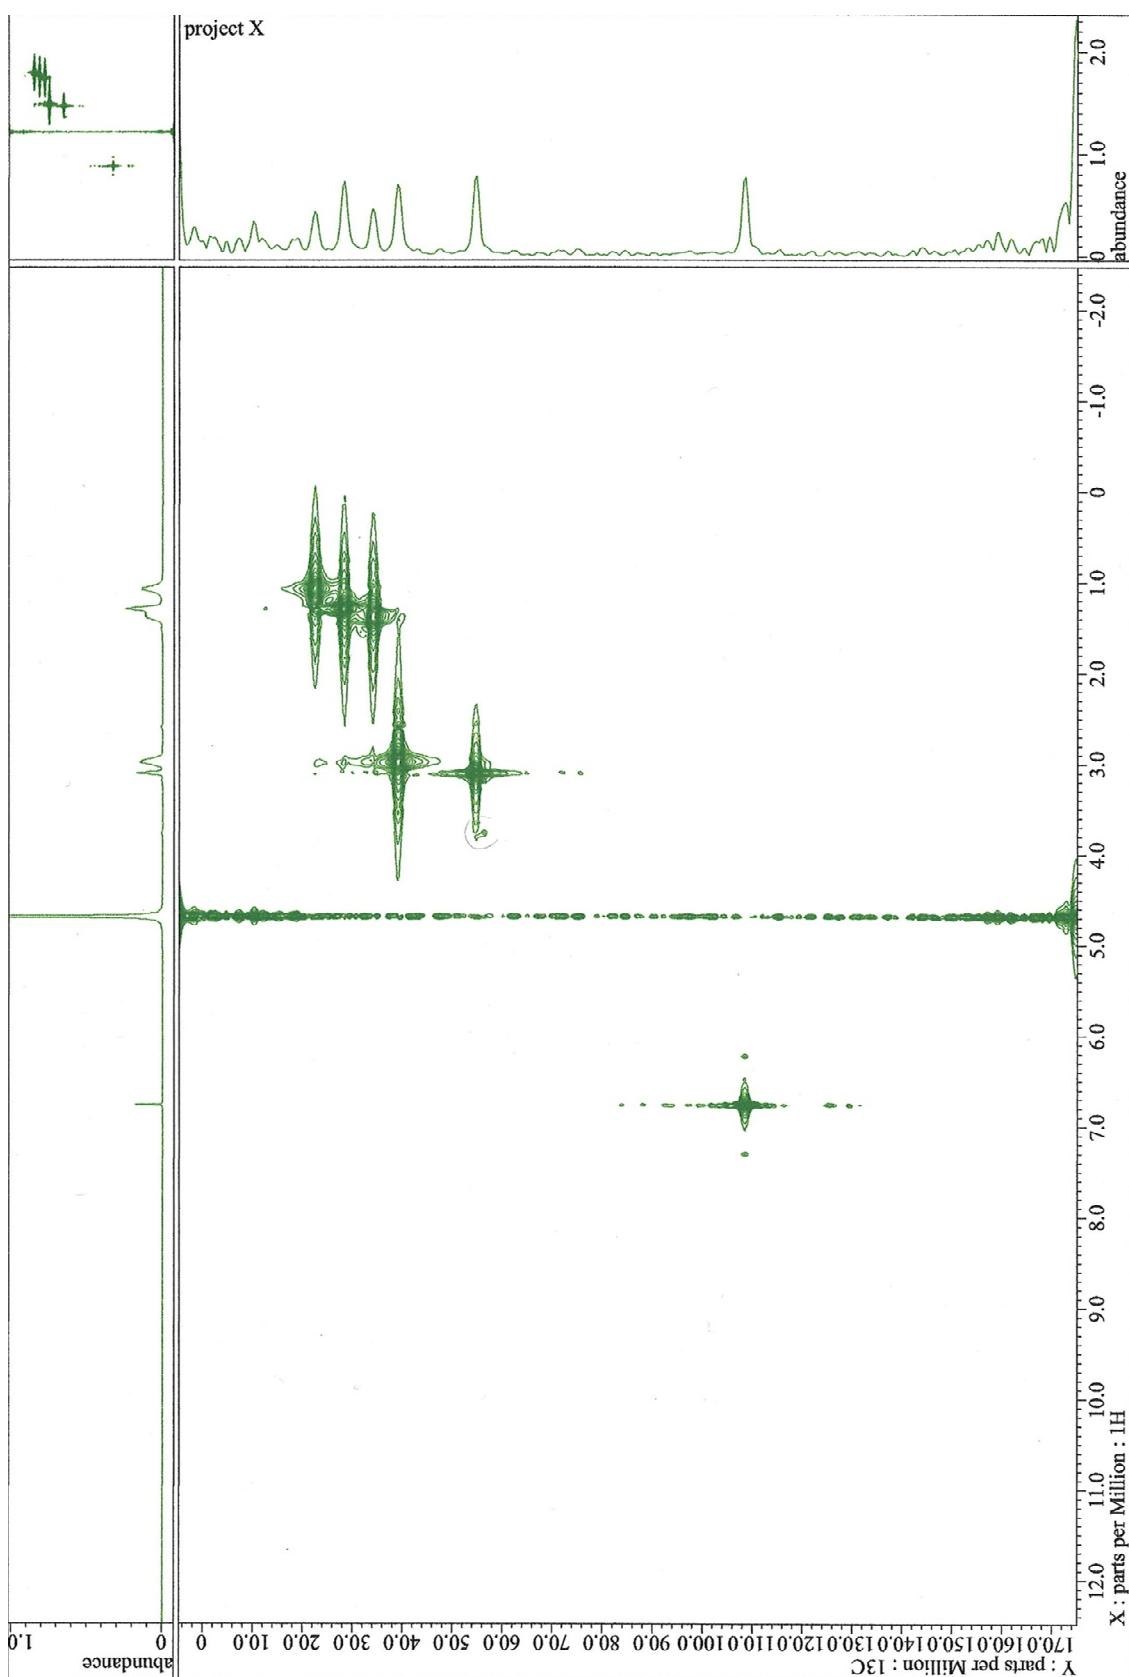

Figure 1b

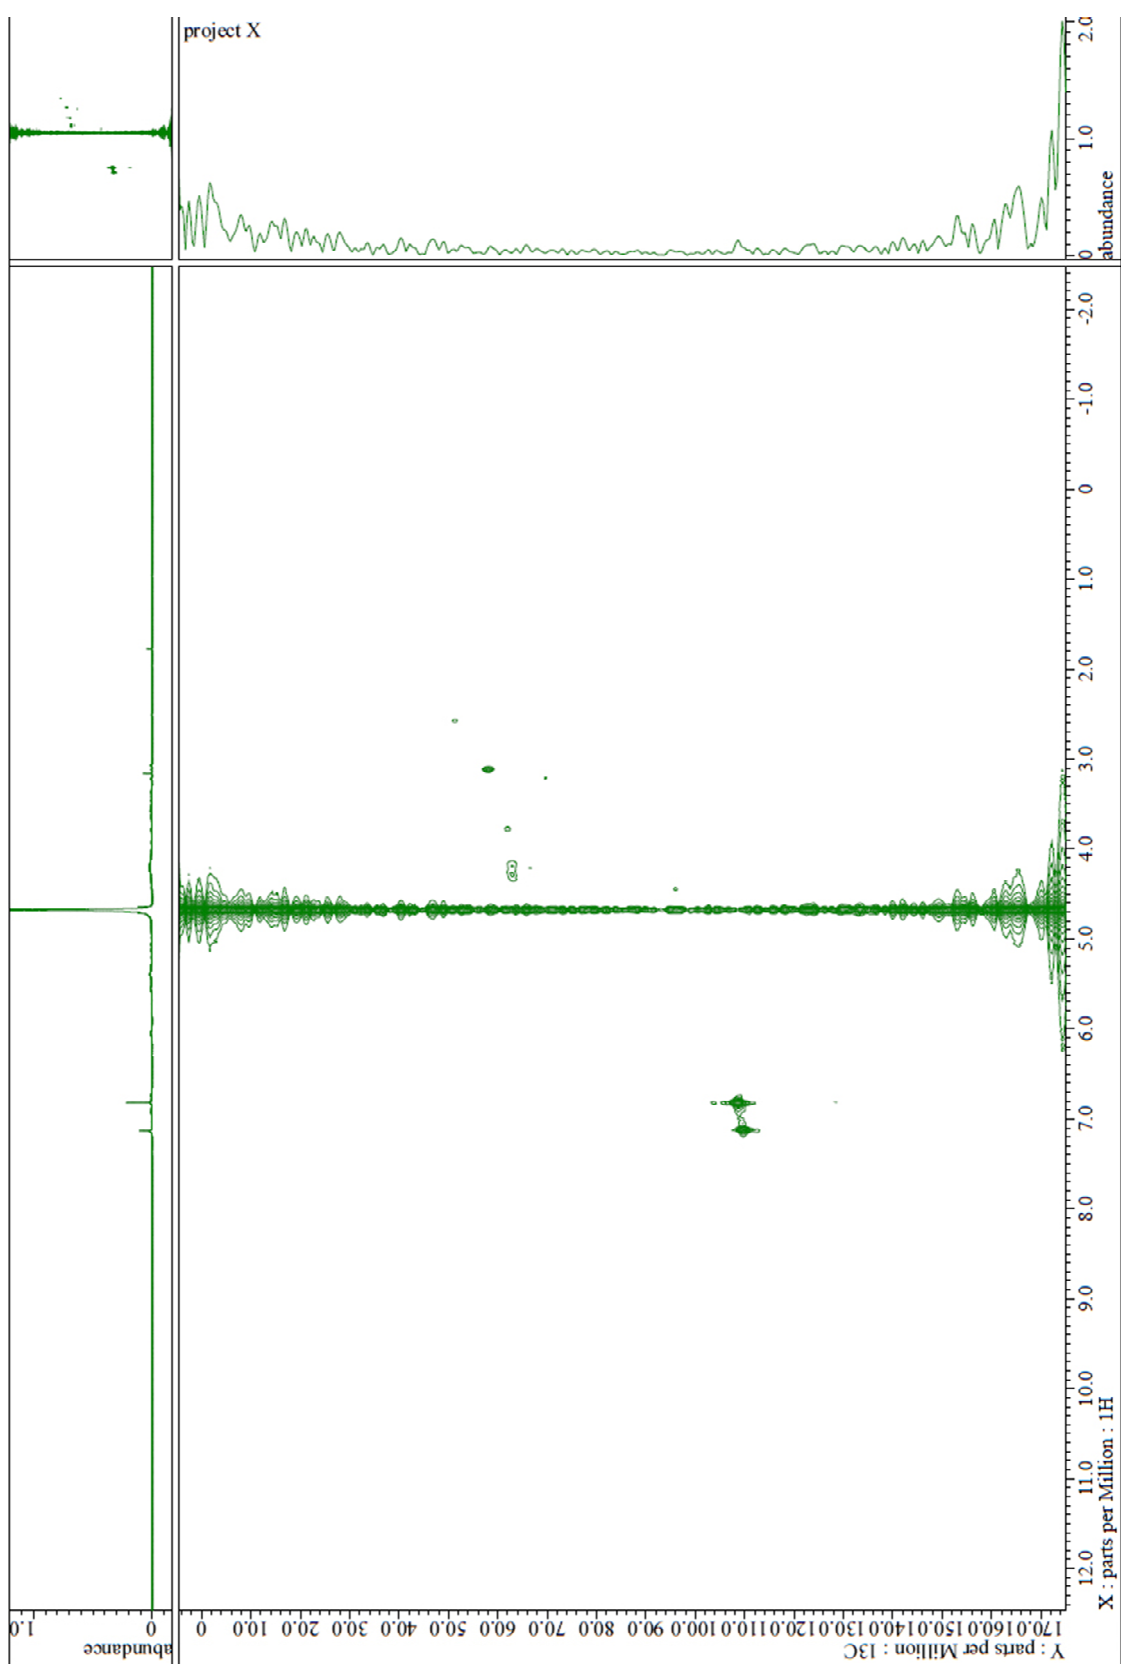

Figure 2a

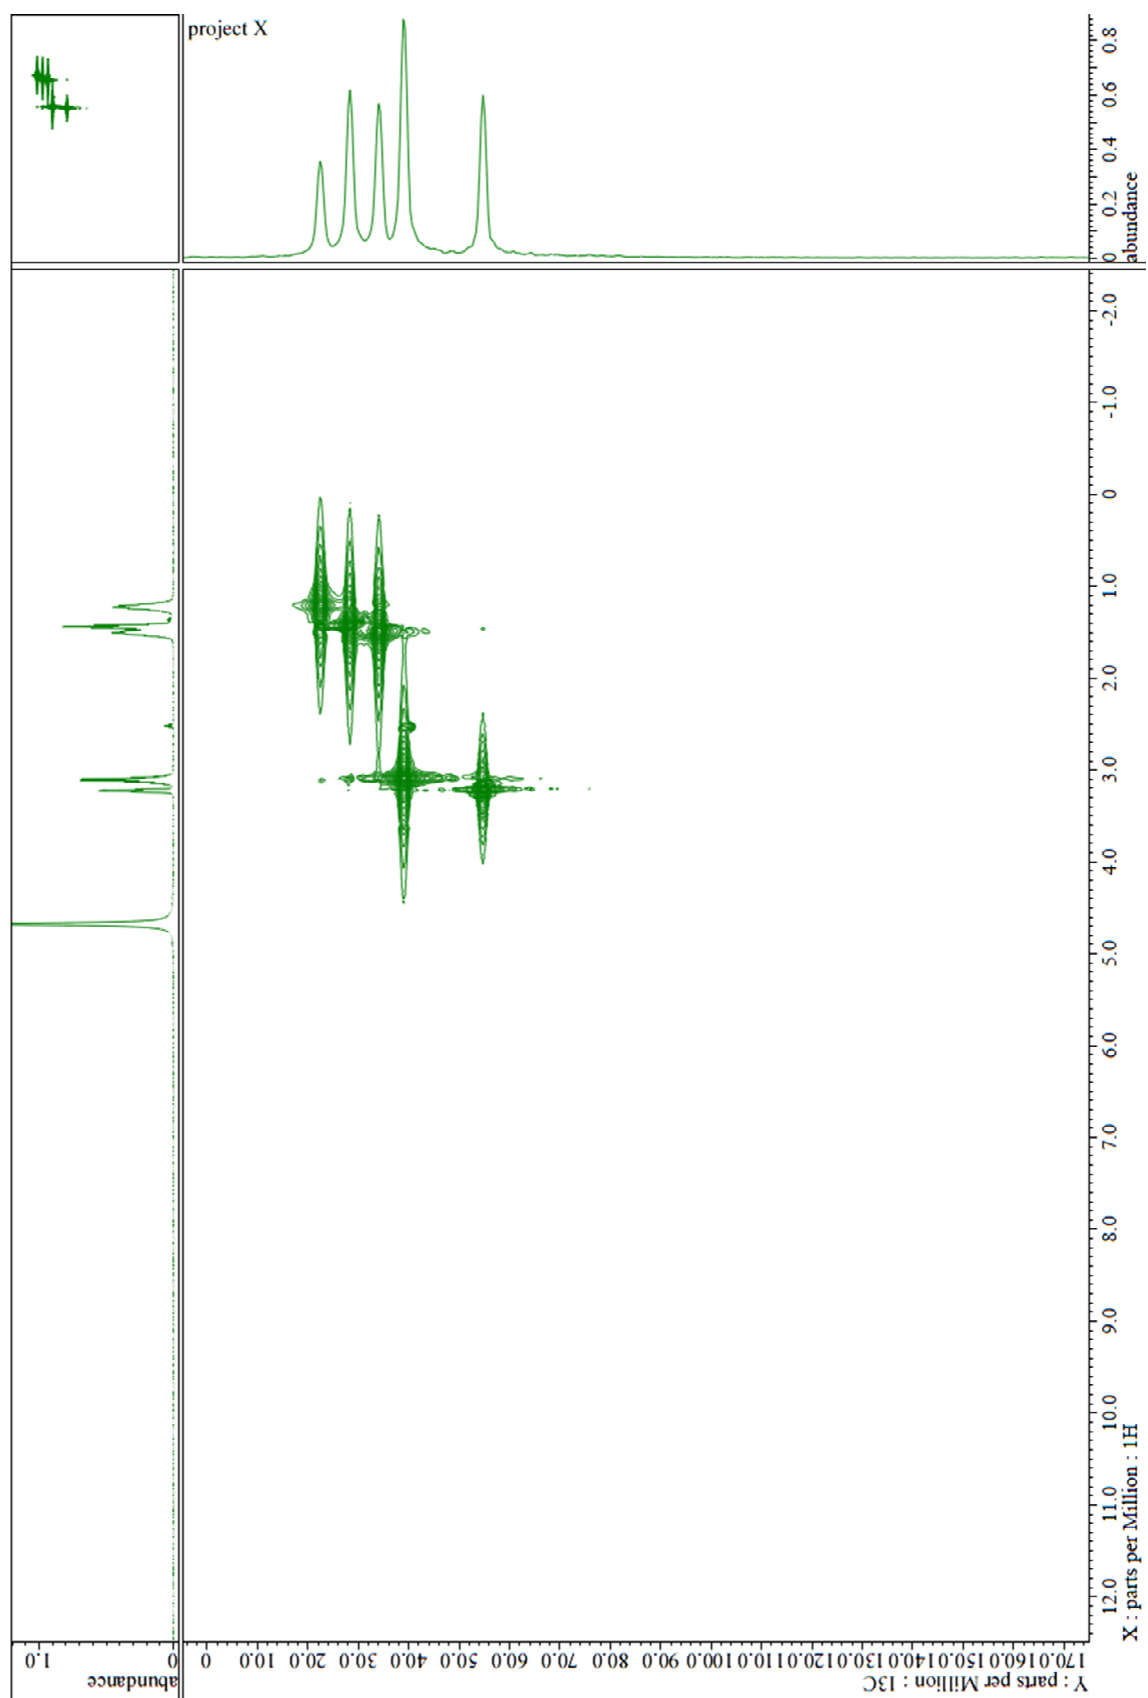

Figure 2b

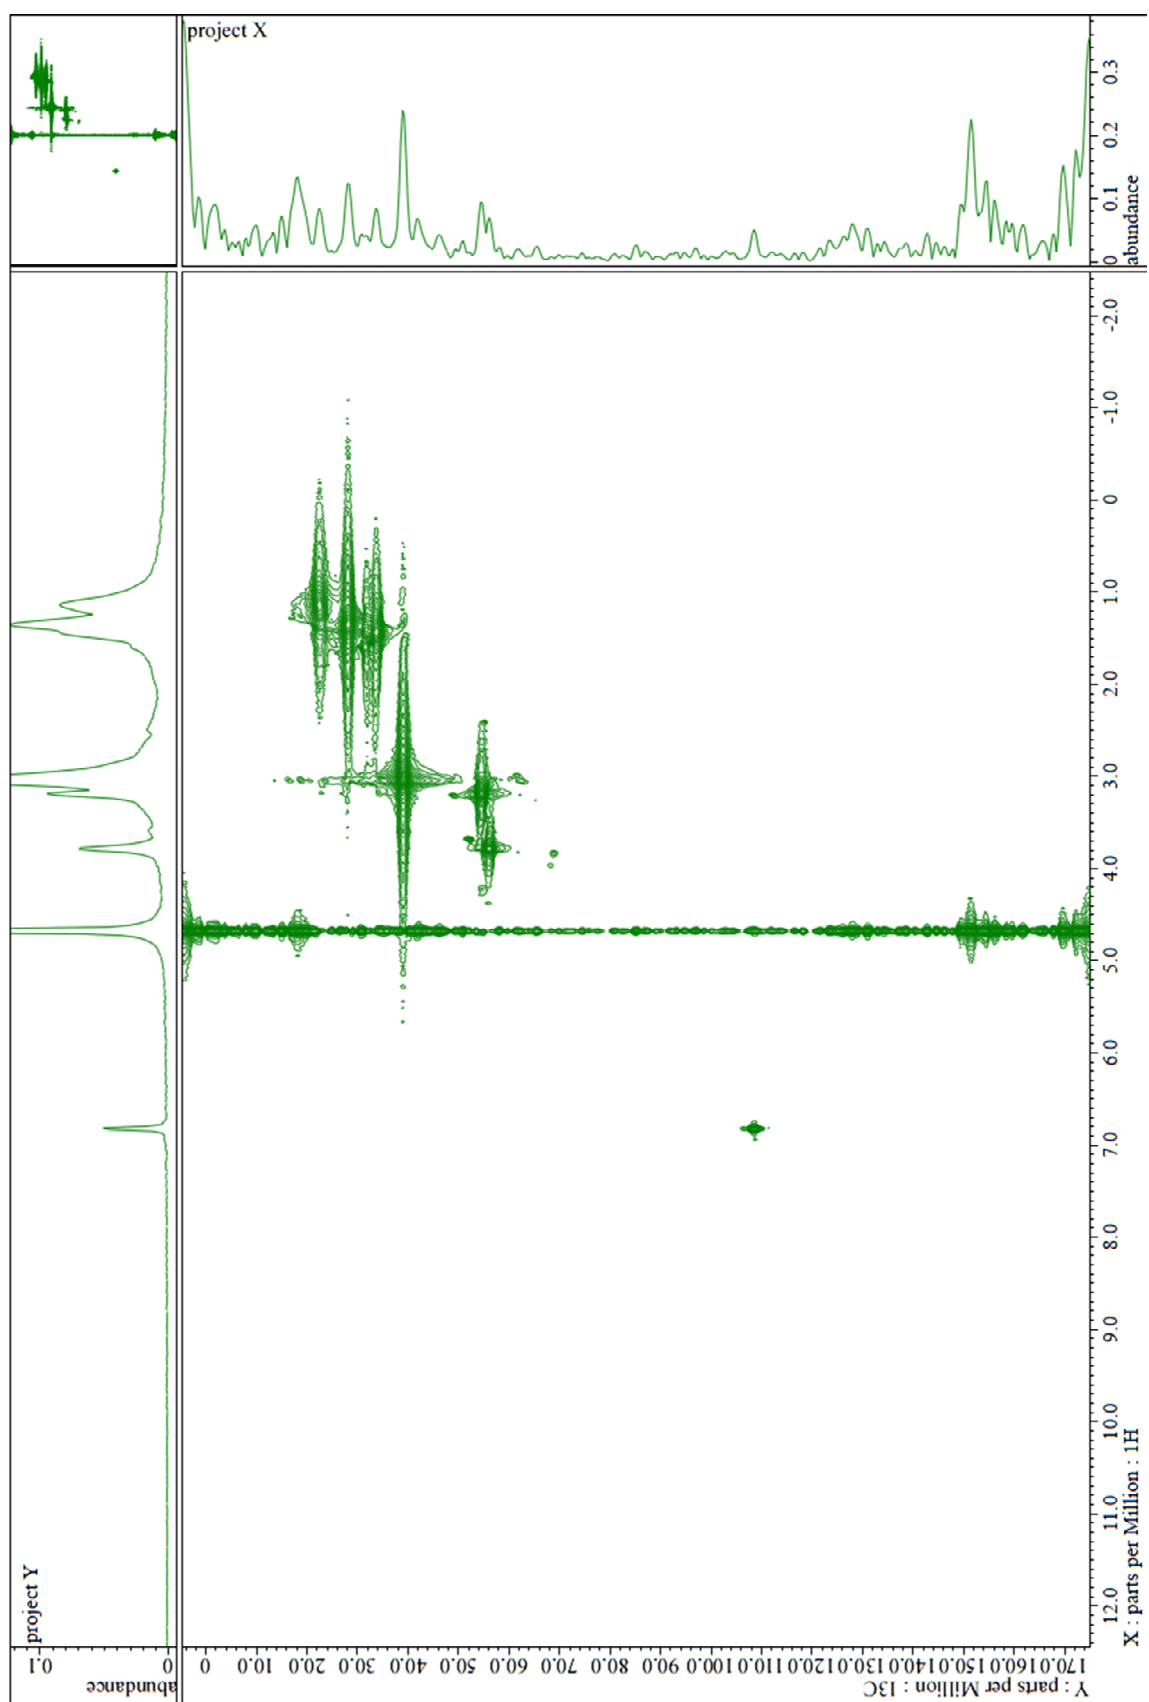

Figure 2c

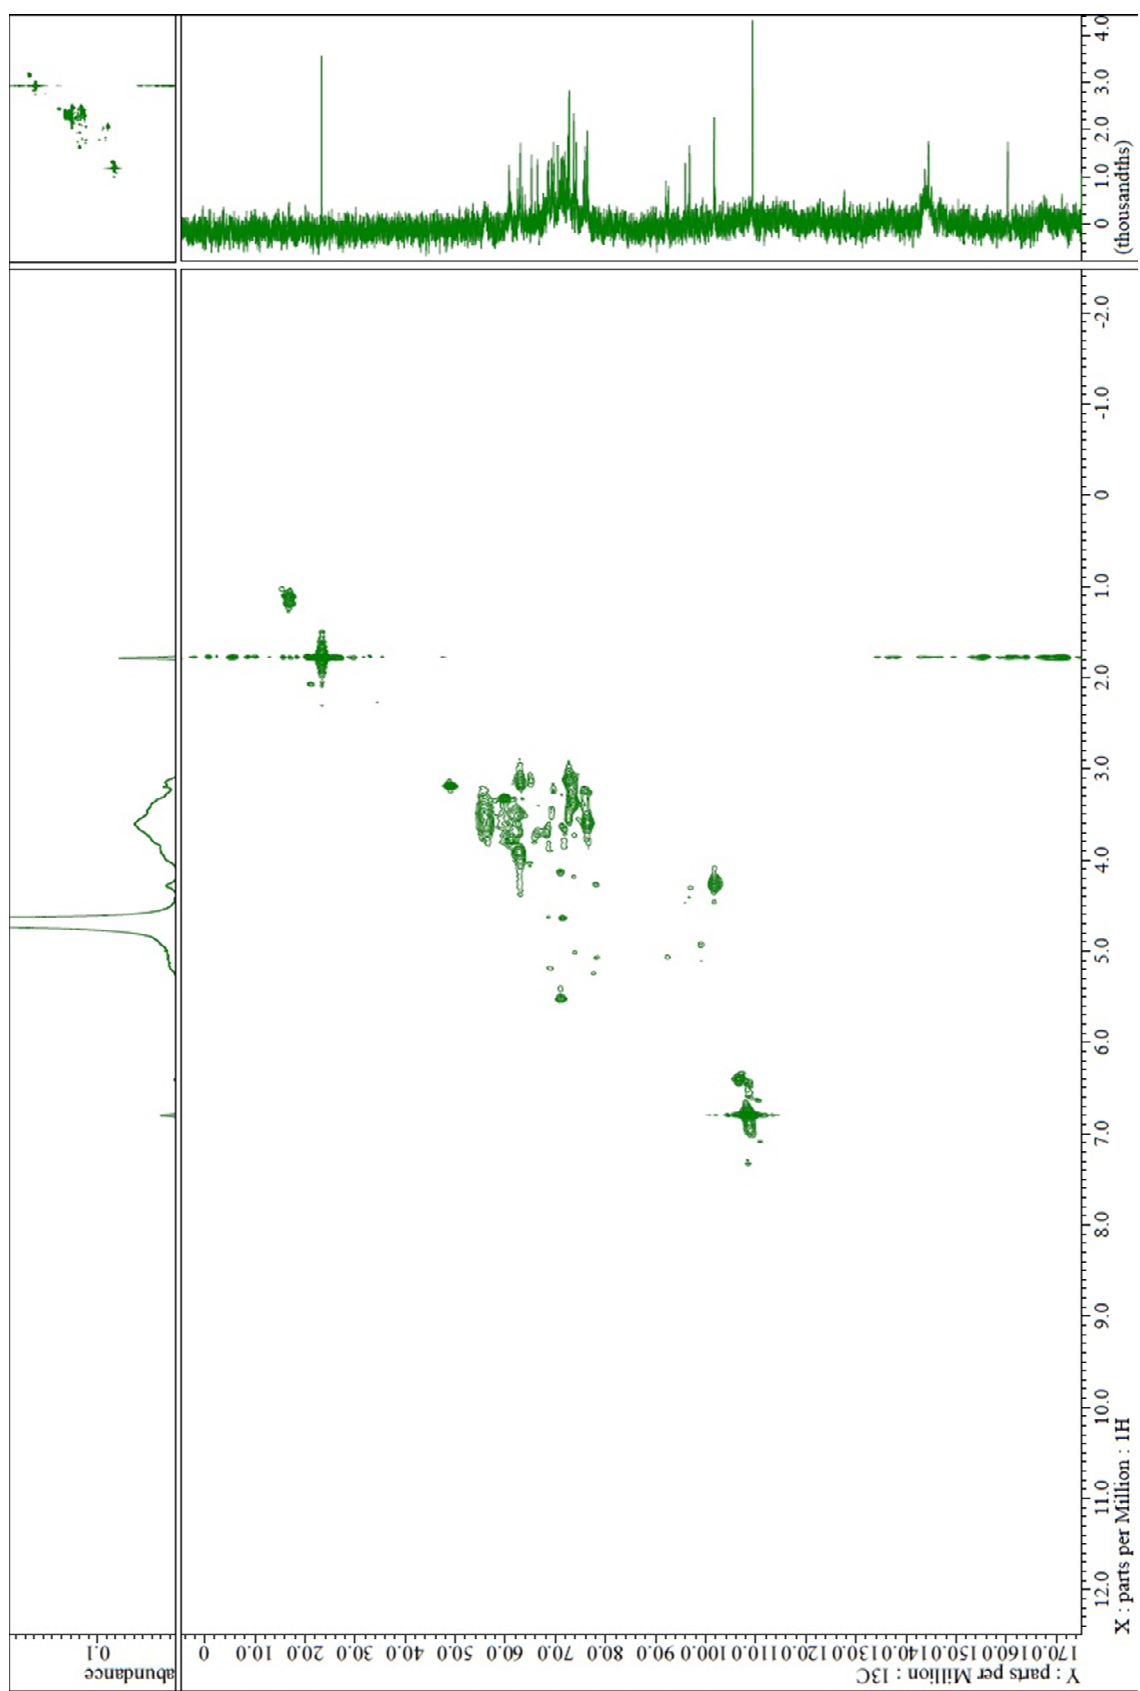

Figure 3a

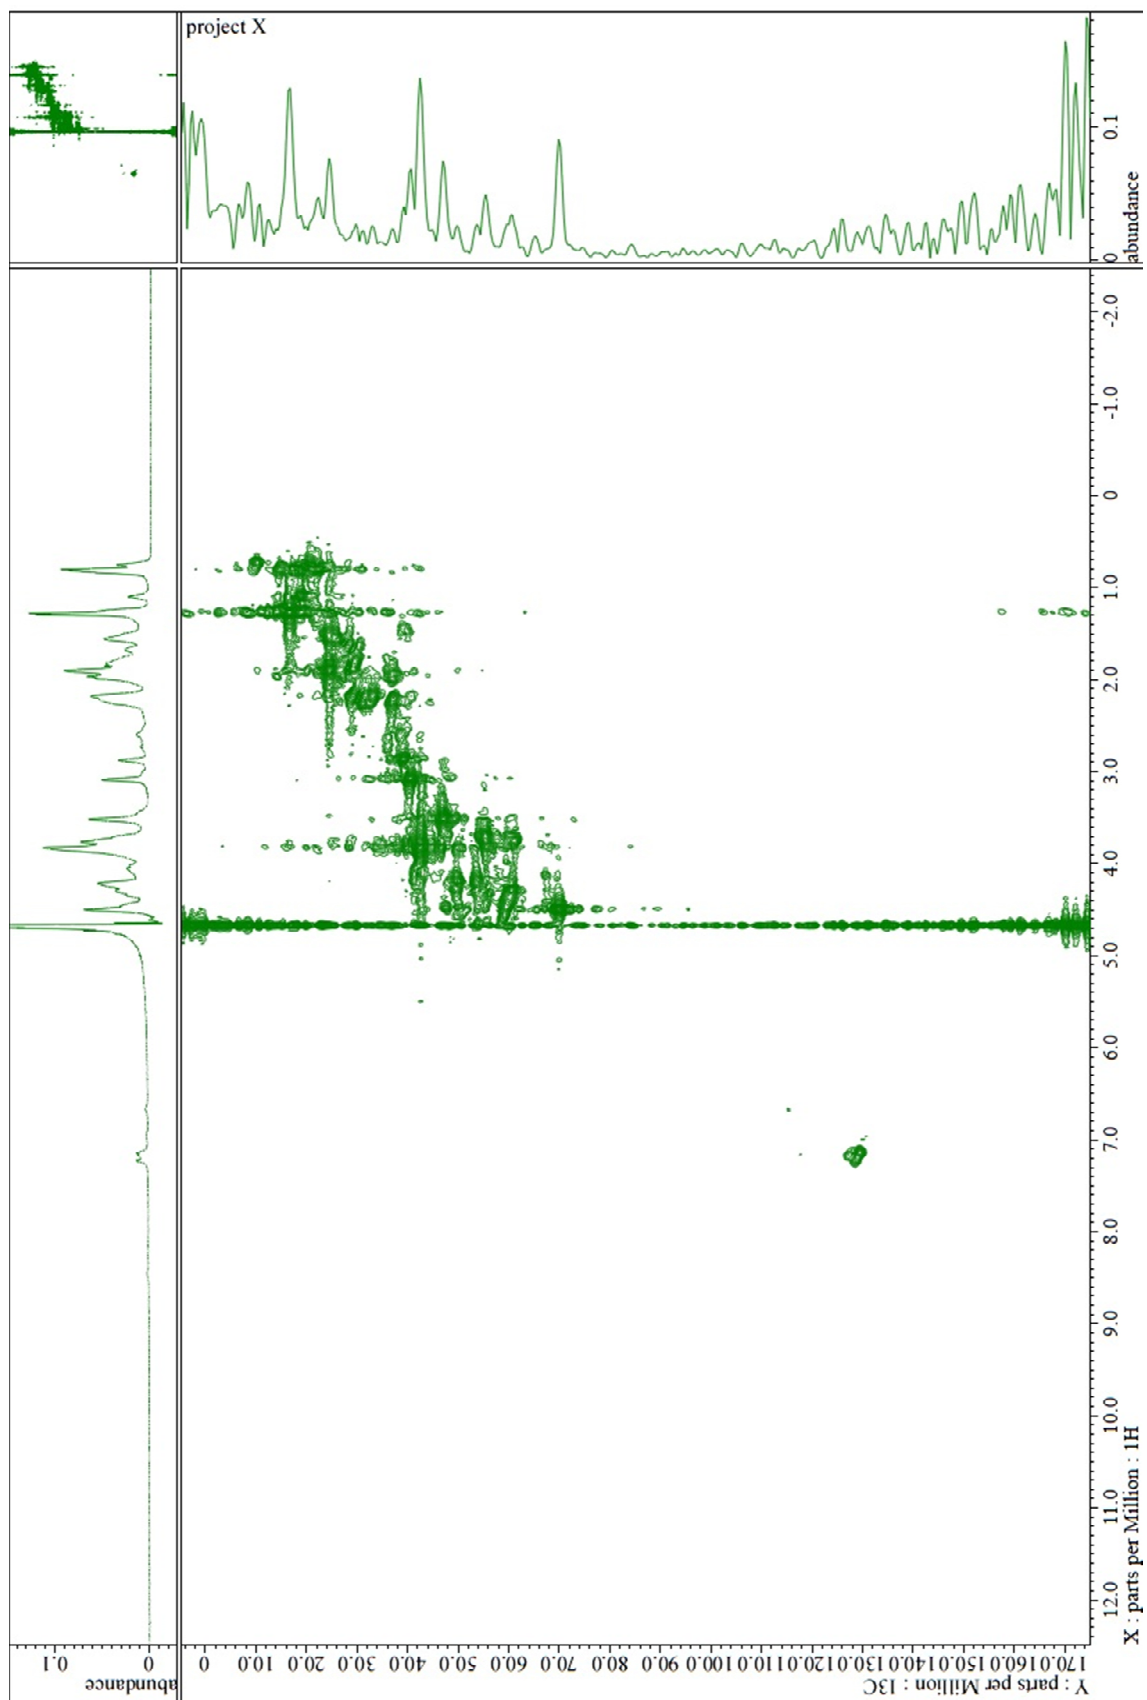

Figure 3b

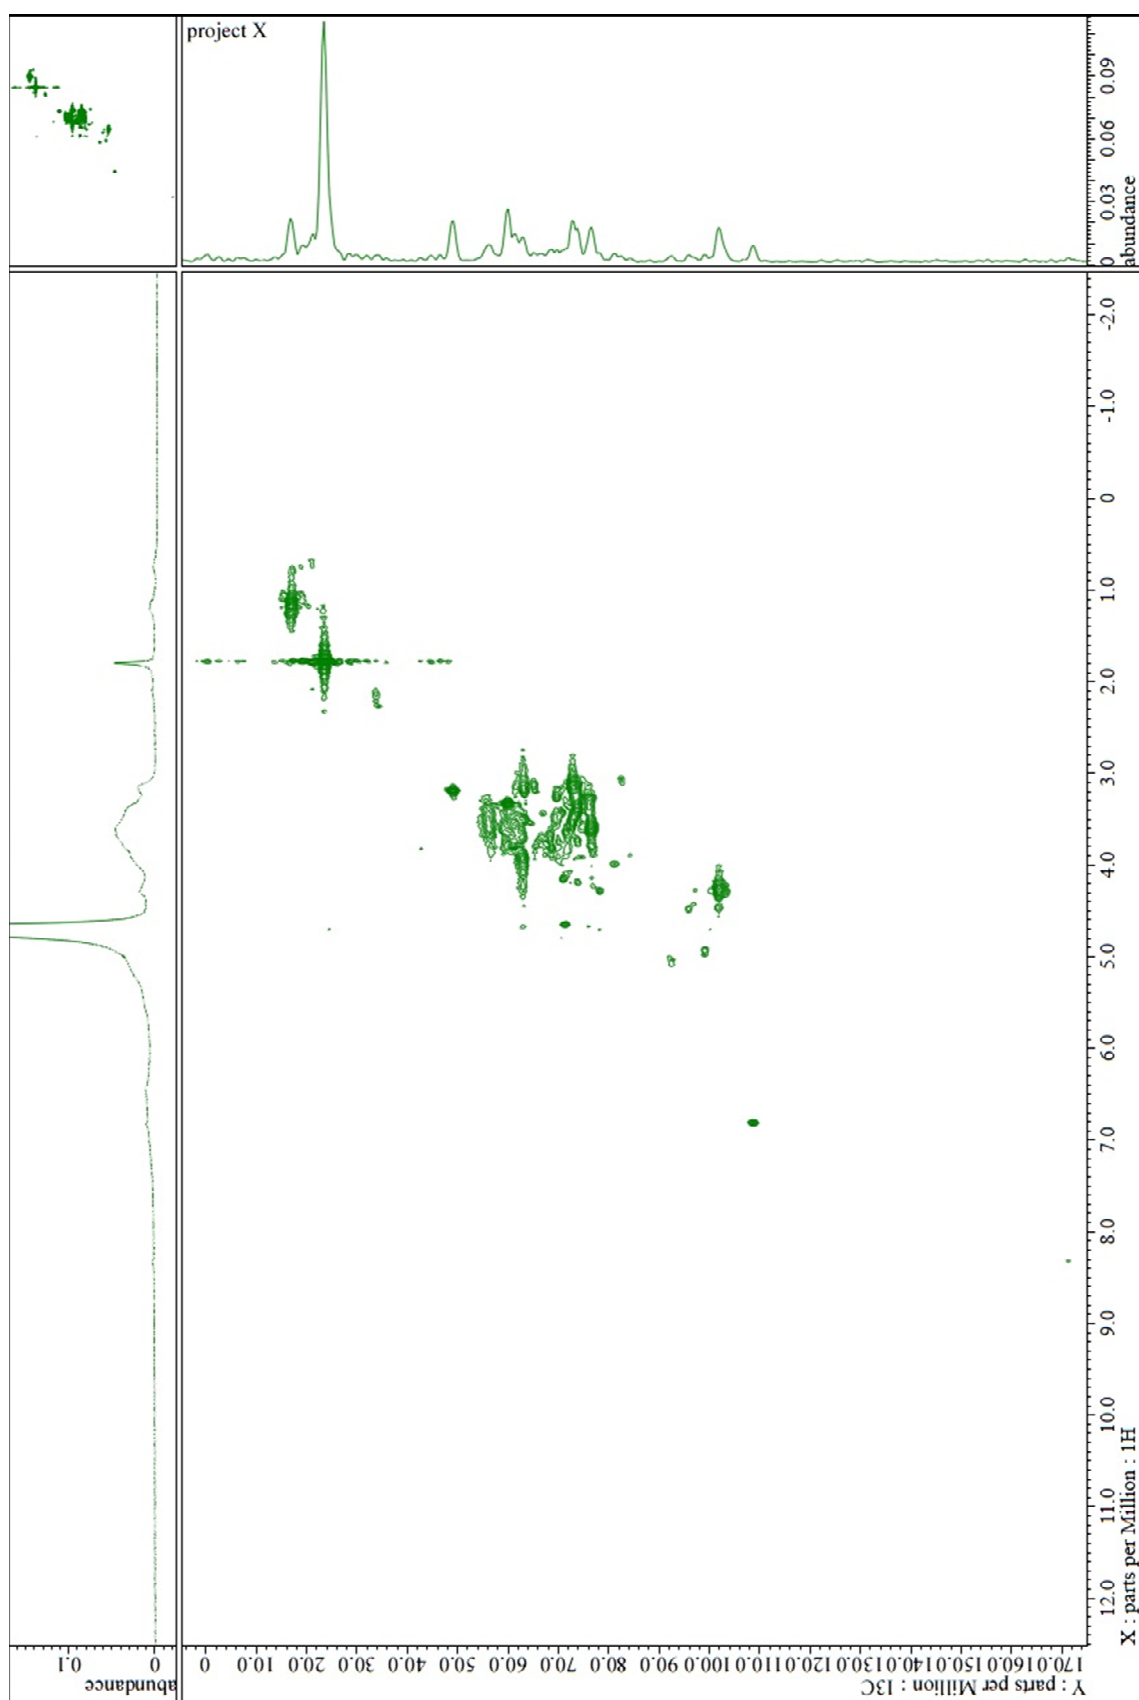

Figure 3c

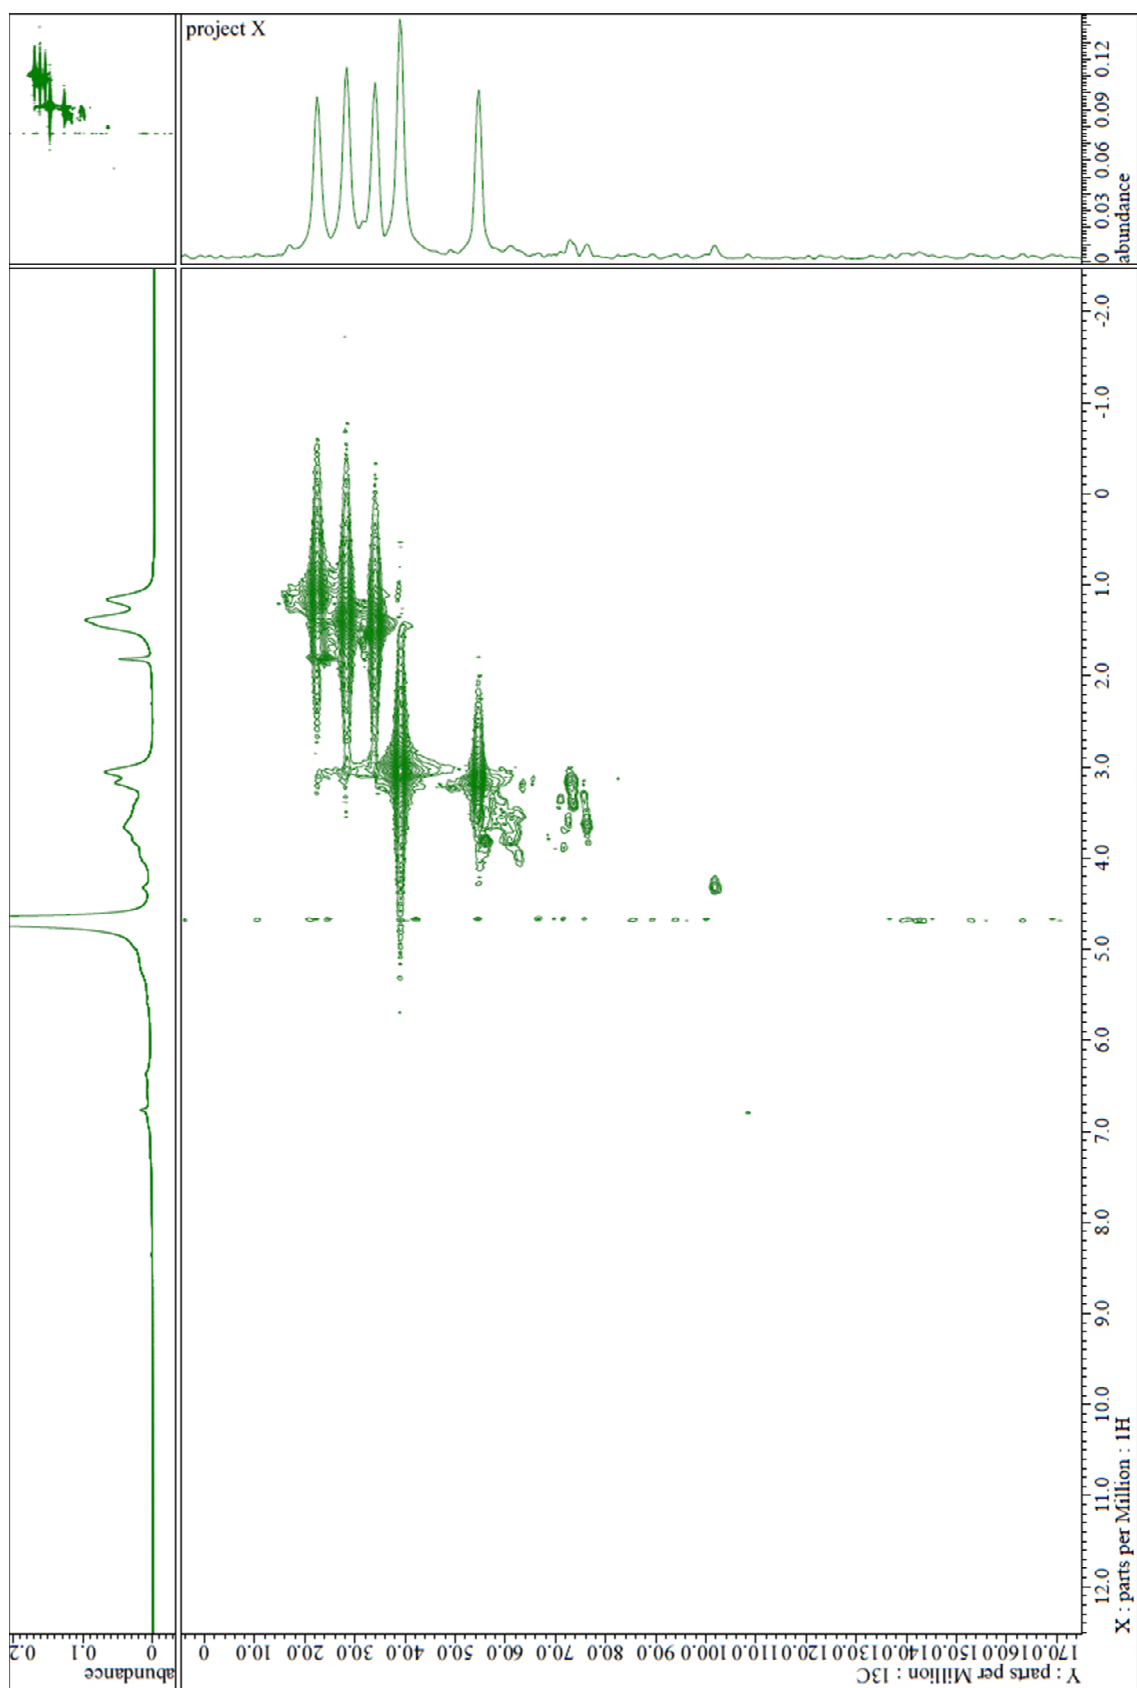

Figure 3d

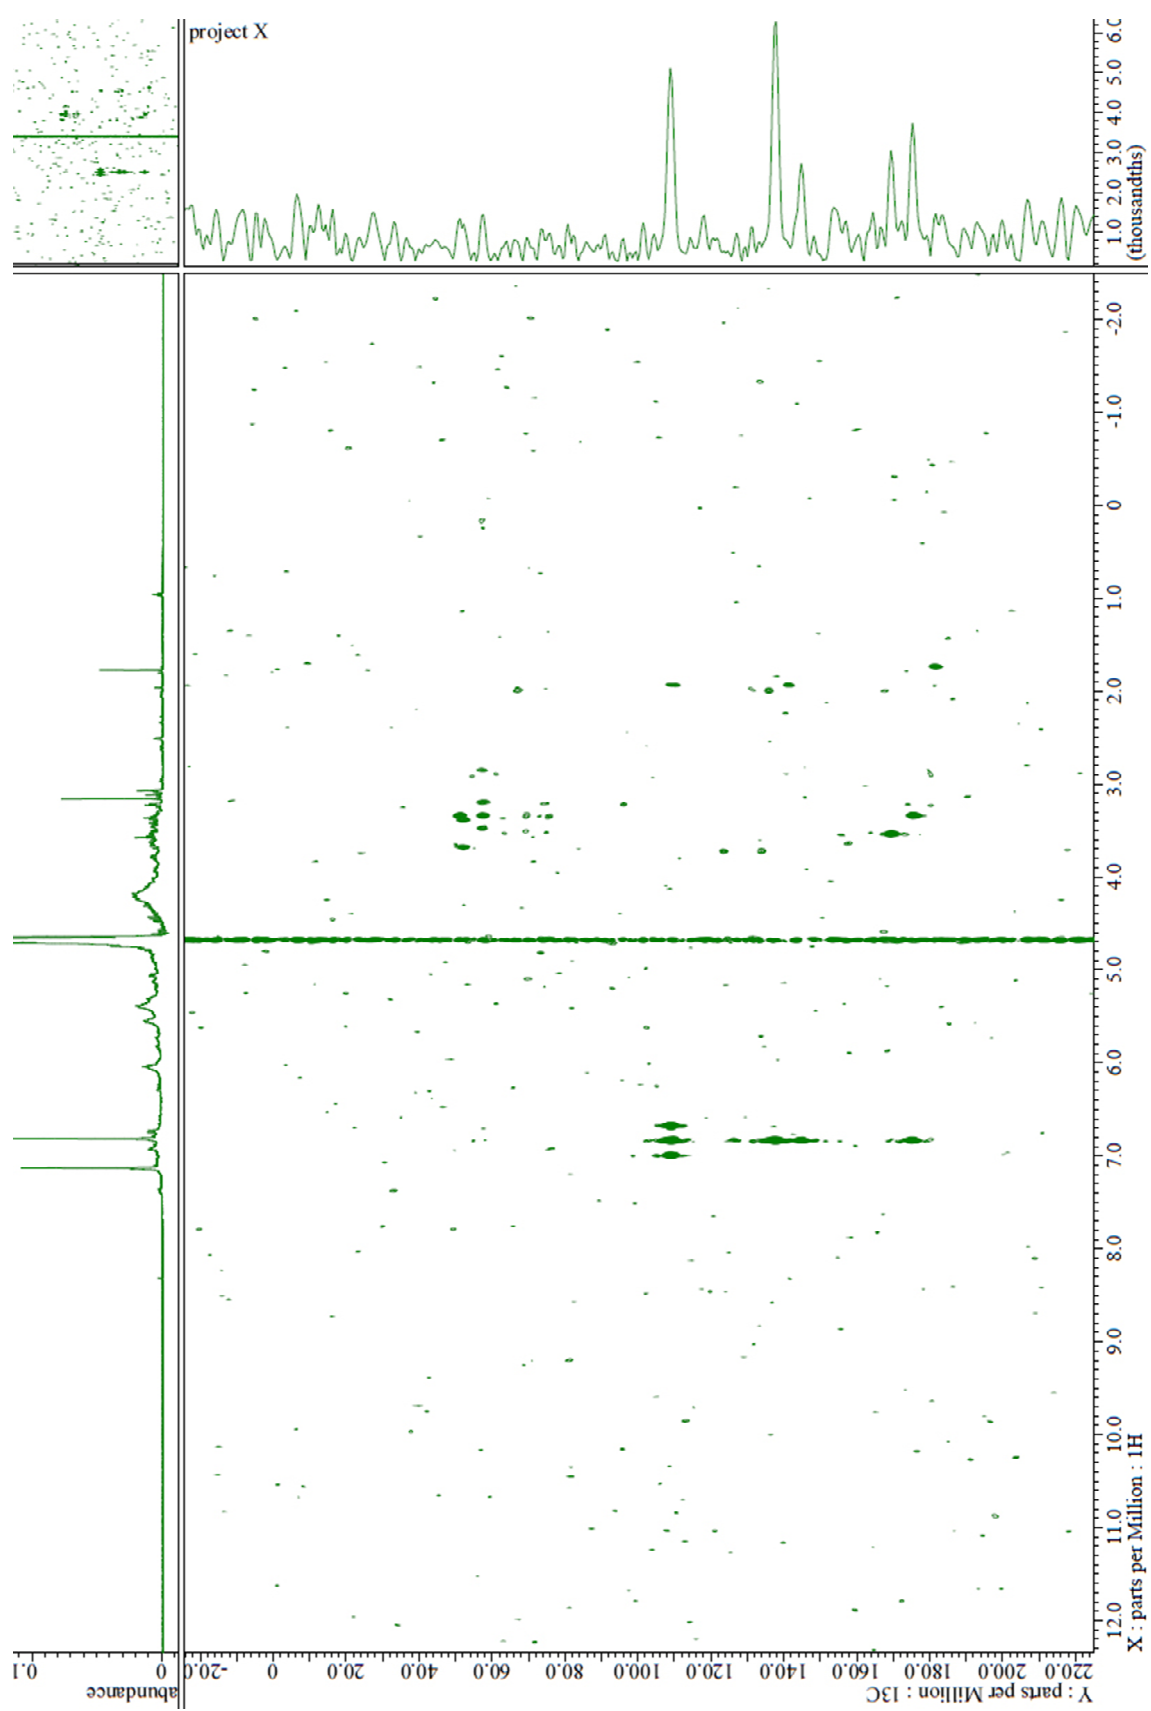

Figure 4a

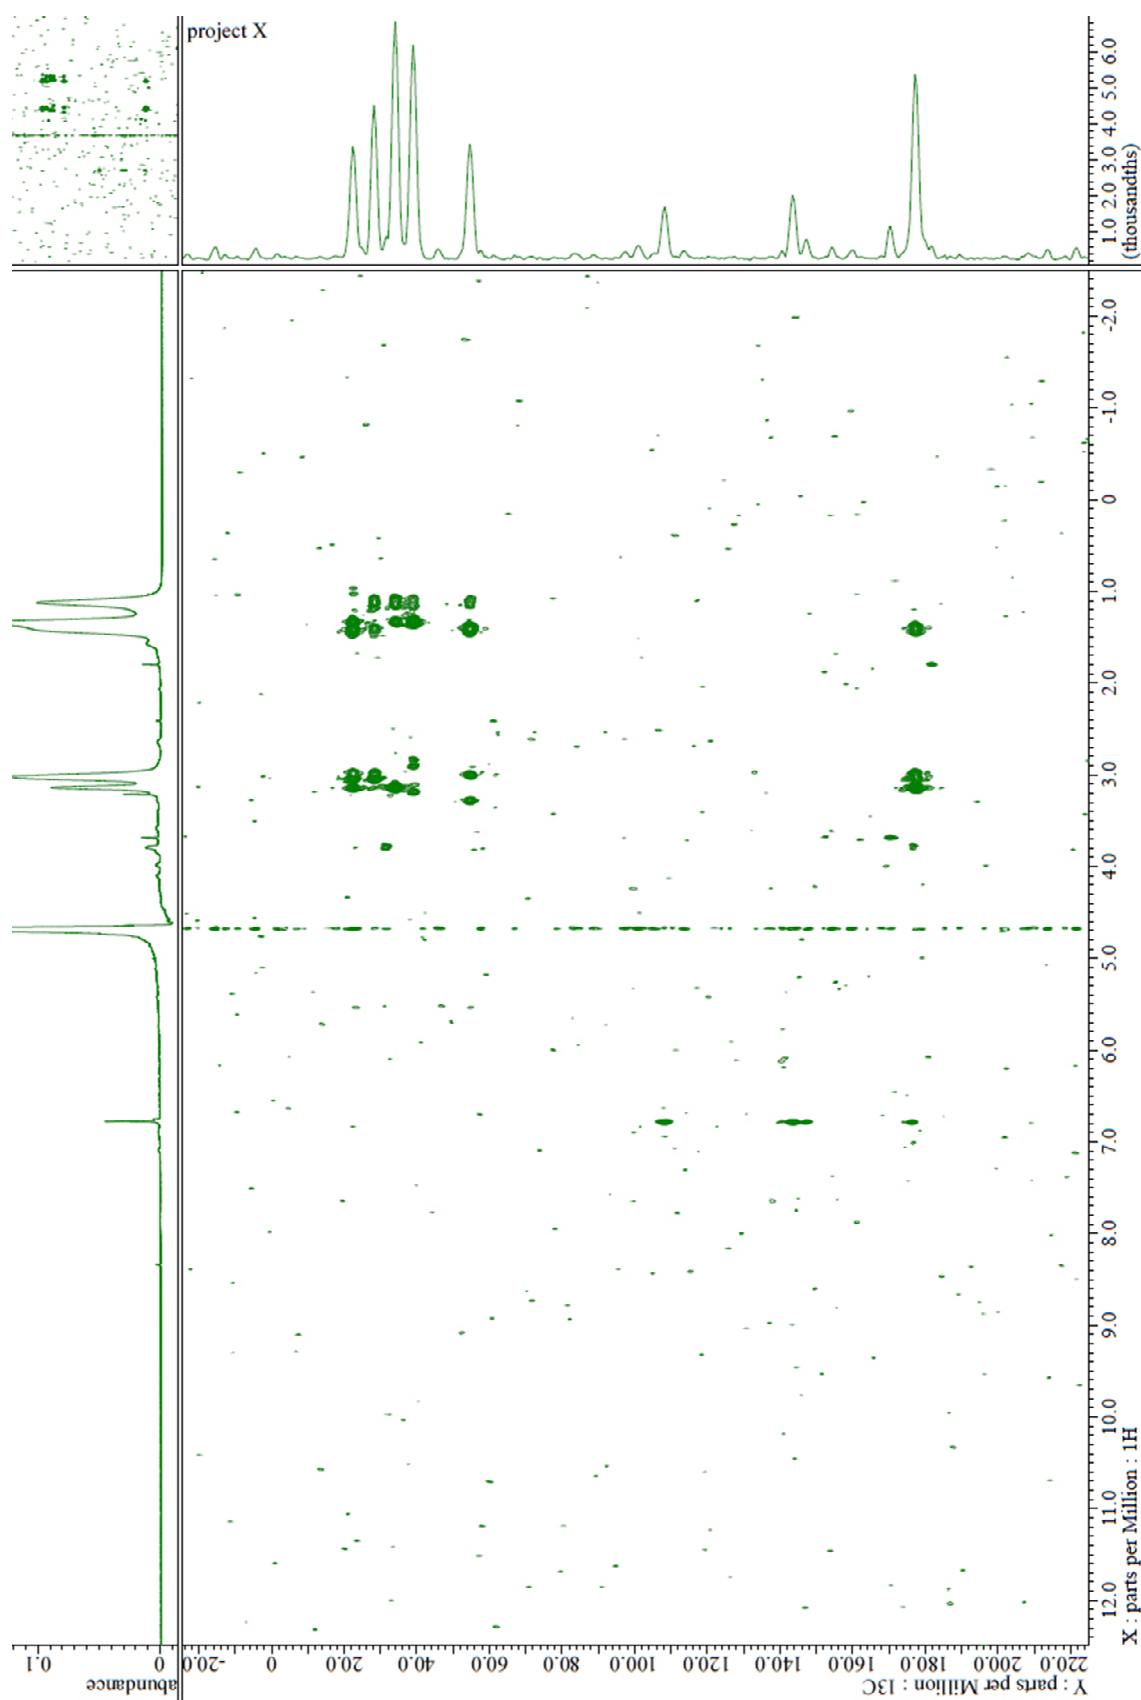

Figure 4b
